# Supplementary material for: Care of older people and people requiring palliative care with COVID‐19: guidance from the Australian National COVID‐19 Clinical Evidence Taskforce
Source: PubMed Central journal article supplement — Med J Aust. 2021 Dec 5;216(4):203–8. doi: 10.5694/mja2.51353 (PMC9299653; doi:10.5694/mja2.51353), 2021-12-05
Supplement: MJA2-216-203-s001.pdf [file MJA2-216-203-s001.pdf]

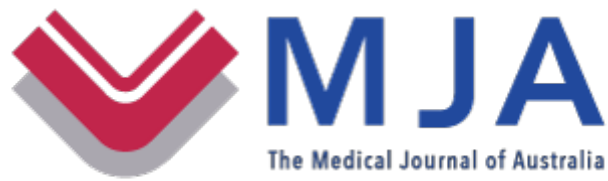

## **Supporting Information**

### **Supplementary material**

This appendix was part of the submitted manuscript and has been peer reviewed.  
It is posted as supplied by the authors.

Appendix to: Cheyne S, Lindley RI, Smallwood N, et al. Care of older people and people requiring palliative care with COVID-19: guidance from the Australian National COVID-19 Clinical Evidence Taskforce. *Med J Aust* 2021; doi: 10.5694/mja2.51353.

## Acknowledgements

We would like to acknowledge all individual members of the COVID-19 Taskforce. Steering Committee: Sharon McGowan (Chair), Nicola Ballenden, Terri-Lee Barrett, Vanessa Beavis, James Beckford Saunders, Tanya Buchanan, Marina Buchanan-Grey, Dawn Casey, Marita Cowie, Joseph Doyle, Mark Frydenberg, Danijela Gnjidic, Sally Green, Rohan Greenland, Ken Griffin, Stephan Groombridge, Louise Hardy, Alison Hodak, Anthony Holley, Vase Jovanovska, Sabina Knight, Kristin Michaels, Peter Morley, Julia Morphet, Suzi Nou, Phillip Russo, Megan Sarson, Alan Young. Executive Team: Julian Elliott, Rhiannon Tate, Britta Tendal, Sarah Norris, Bronwyn Morris-Donovan, Joshua Vogel, Sharon Gurry, Eloise Hudson, Shauna Hurley, Declan Primmer, Samantha Timms, Susan Whicker. National Guidelines Leadership Group: Julian Elliott (Co-Chair), Sutapa Mukherjee (Co-Chair), Joshua Vogel (Deputy Chair), Jason Agostino, Karen Booth, Lucy Burr, Lyn Byers, Peter Cameron, Megan Cooper, Allen Cheng, Peter Fowler, Mark Frydenberg, Alan Glanville, Caroline Homer, Karin Leder, Steve McGloughlin, Brendan McMullan, Ewen McPhee, Brett Mitchell, Mark Morgan, Paul Myles, Chris O'Donnell, Michael Parr, Jane Phillips, Rebecca Randall, Wayne Varndell, Ian Whyte, Leeroy William. Consumer Panel: Rebecca Randall (Chair), Richard Brightwell, Lynda Condon, Amrita Deshpande, Adam Ehm, Monica Ferrie, Joanne Muller, Lara Pullin, Elizabeth Robinson, Adele Witt, Lynda Condon, Mya Cubitt, Chris Lassig, Joanne Muller, Sophie Noble, Elle Peters-Wisniak, Nicholas Wood. Primary and Chronic Care Panel: Sarah Larkins (Co-Chair), Mark Morgan (Co-Chair), Georgina Taylor (Deputy Chair), Jason Agostino, Paul Burgess, Penny Burns, Lyn Byers, Kirsty Douglas, Ben Ewald, Dan Ewald, Dianna Fornasier, Sabina Knight, Carmel Nelson, Louis Peachey, David Peiris, Mieke van Driel, Lucie Walters, Ineke Weaver, David Watters, Dina Watterson, Nicole Allard, Kathryn Bailey, Alistair Miller. Hospital and Acute Care Panel: Lucy Burr (Chair), Simon Hendel (Deputy Co-Chair), Kiran Shekar (Deputy Co-Chair), Bronwyn Avard, Kelly Cairns, Allan Glanville, Nicky Gilroy, Paul Myles, Robert O'Sullivan, Owen Robinson, Chantal Sharland, Sally McCarthy, Peter Wark. Critical Care Panel: Steve McGoughlin (Co-Chair), Priya Nair (Co-Chair), Carol Hodgson, (Deputy Chair), Melissa Ankravs, Craig French, Kim Hansen, Sue Huckson, Jon Iredell, Carrie Janerka, Rose Jaspers, Ed Litton, Stephen Macdonald, Sandra Peake, Ian Seppelt. Pregnancy and Perinatal Care Panel: Caroline Homer (Co-Chair), Vijay Roach (Co-Chair), Michelle Giles (Deputy Co-Chair), Clare Whitehead (Deputy Co-Chair), Wendy Burton, Teena Downton, Glenda Gleeson, Adrienne Gordon, Jenny Hunt, Jackie Kitschke, Nolan McDonnell, Philippa Middleton, Jeremy Oats. Paediatric and Adolescent Care Panel: Asha Bowen (Co-Chair), Brendan McMullan (Co-Chair), David Tingay (Deputy Co-Chair), Nan Vasilunas (Deputy Co-Chair), Lorraine Anderson, James Best, Penny Burns, Simon Craig, Simon Erickson, Nick Fancourt, Zoy Goff, Vimbai Kapuya, Catherine Keyte, Lorelle Malyon, Mark Moore, Danielle Wurzel. Palliative and Aged Care Panel: Meera Agar (Co-Chair), Richard I Lindley (Co-Chair), Natasha Smallwood (Deputy Chair), Mandy Callary, Michael Chapman, Philip Good, Peter Jenkin, Deidre Morgan, Vasi Naganathan, Velandai Srikanth, Penny Tuffin, Elizabeth Whiting, Leeroy William, Patsy Yates. Disease-Modifying Treatment and Chemoprophylaxis Panel: Bridget Barber, Jane Davies, Josh Davis, Dan Ewald, Amanda Gwee, Karin Leder, Gail Matthews, James McCarthy, James McMahan, Trisha Peel, Chris Raftery, Megan Rees, Jason Roberts, Ian Seppelt, Tom Snelling, Brad Wibrow. Infection Prevention and Control Panel: John Ferguson, Phillipa Hore, Kathy Dempsey, Deborah Friedman, Brett Mitchell, Penny Burns, Kate Cole, Melanie Dicks, Bridget Ferguson, Briony Hazelton, Nicole King, Sally McCarthy, Steve McGloughlin, Cherylynn McGurgan, Malcolm Sim, Andrew Stewardson, Barry Tam. Expert Advisory Group: Ross Baker, Jennifer Curnow, Briony Cutts, Anoop Enjeti, Andrew Forbes, Prahlad Ho, Adam Holyoak, Helen Liley, James McFadyen, Zoe McQuilten, Eileen Merriman, Helen Savoia, Chee Wee Tan, Huyen Tran, Chris Ward, Katrina Williams. Cardiac Arrest Working Group: Neil Ballard, Samantha Bendall, Neel Bhandari, Lyn Byers, Simon Craig, Dan Ellis, Dan Ewald, Craig Fairley, Brett Hoggard, Minh Le Cong, Peter Morley, Priya Nair, Andrew Pearce. Evidence Team: Britta Tendal, Steve McDonald, Tari Turner, Joshua Vogel, David Fraile Navarro, Heath White, Samantha Chakraborty, Saskia Cheyne, Henriette Callesen, Sue Campbell, Jenny Ring, Agnes Wilson, Tanya Millard, Melissa Murano, Skye Newton, Brea Kunstler, Alexis Poole, Hayley Hill. Observational Data Working Group: David Henry (Co-Chair), Sallie Pearson (Co-Chair), Douglas Boyle, Kendal Chidwick, Wendy Chapman, Craig French, Chris Pearce, Tom Snelling. Independent Conflicts of Interest Committee: Lisa Bero (Chair), Quinn Grundy, Joel Lexchin, Barbara Mintzes.

We would like to acknowledge the Member Organisations: Australian Living Evidence Consortium (Convenor), Cochrane Australia (Secretariat), Allied Health Professions Australia, Australasian Association of Academic Primary Care, Australian Association of Gerontology, Australasia College for Emergency Medicine, Australasian College for Infection Prevention and Control, Australasian Society for Infectious Diseases, Australasian College of Paramedicine, Australasian Society of Clinical and Experimental Pharmacologists and Toxicologists, Australian and New Zealand College of Anaesthetists, Australian and New Zealand Intensive Care Society, Australian & New Zealand Society for

Geriatric Medicine, Australian College of Critical Care Nurses, Australian College of Midwives, Australian College of Nursing, Australian College of Rural and Remote Medicine, Australian COVID-19 Palliative Care Working Group, Australian Primary Health Care Nurses Association, Australian Resuscitation Council, Australasian Sleep Association, Australian Society of Anaesthetists, Australasian College of Paramedicine, College of Emergency Nurses Australasia, CRANaplus, National Aboriginal Community Controlled Health Organisation, Royal Australasian College of Physicians, Royal Australian College of Surgeons, Royal Australian and New Zealand College of Obstetricians and Gynaecologists, Royal Australian College of General Practitioners, Society of Hospital Pharmacists of Australia, Thoracic Society of Australia and New Zealand, Thrombosis and Haemostasis Society of Australia and New Zealand.

We would like to acknowledge our Partners: Monash University, Monash School of Public Health and Preventive Medicine, Consumers Health Forum of Australia, NPS MedicineWise, Covidence, MAGIC, Australian Commission on Safety and Quality in Health Care, Cochrane, Hereco, Adelaide Health Technology Assessment

We would like to acknowledge our Funders: Australian Government Department of Health, Victorian Government Department of Health and Human Services, The Ian Potter Foundation, Walter Cottman Endowment Fund, managed by Equity Trustees, Lord Mayors' Charitable Foundation.

# MANAGEMENT OF PEOPLE WITH COVID-19 WHO ARE OLDER AND LIVING WITH FRAILTY AND/OR COGNITIVE IMPAIRMENT

## LEGEND

**EBR:** Evidence-Based Recommendation  
**CBR:** Consensus-Based Recommendation  
**PP:** Practice Point

Living  
guidance

Not prioritised  
for review

**VERSION 5.0**

PUBLISHED  
1 JULY 2021

## Overarching principles of care

### GOALS OF CARE

Identify if the patient has an advance care directive or plan. If yes, reaffirm prior decision. **PP** [Taskforce]

Ensure early discussion with the patient around goals of care, which may include active disease-directed care. If the patient has a legal guardian for medical decision-making, they should be contacted. **PP** [Taskforce]

Respect priorities and preferences and take these into account where possible when deciding on and communicating the care plan. **PP** [Taskforce]

Undertake a clinical assessment to determine expected prognosis, taking into account COVID-19 illness and underlying conditions. **PP** [Taskforce]

### COMMUNICATION

Establish a timely and ongoing regular line of communication, with a nominated family/caregiver. **PP** [Taskforce]

Visiting restrictions should be included in care planning discussions to enable patients and families to make informed decisions. **PP** [Taskforce/ANZSPM]

Minimise sensory impairment (e.g. hearing aids available and working, glasses available, and utilise other augmentative and alternative communication devices such as communication boards, electronic communication devices). **PP** [Taskforce]

Ensure effective communication, including the use of interpreters or cultural care workers where appropriate. Remember that those with sensory impairments may not be able to hear or use lip reading to assist in understanding if clinicians have masks on. Consider written communication via room boards or paper on clipboards. **PP** [Taskforce/ANZSPM]

Respiratory distress and a diagnosis of COVID-19 will likely cause high levels of anxiety and distress. There may be worsening of pre-existing mental health conditions. **PP** [SA Health]

Communicate with patients and support their mental wellbeing to help alleviate any anxiety and fear they may have about COVID-19. **PP** [NICE]

Ensure that regular conversations and communication continue and are supported digitally. For example, by use of two-way radios (such as baby monitors) or video tablets to communicate at length without masks and other PPE from outside the patient's room. **PP** [Taskforce/ANZSPM]

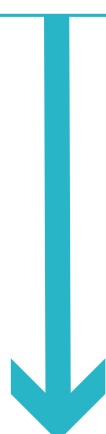

### Older people (> 65 years) living with frailty and/or cognitive impairment

This population includes older people (usually > 65 years) with impairments of physical, cognitive and/or physiological function, or who have frailty. Frailty is a multifaceted syndrome that includes physical impairments and higher susceptibility to disease. Comorbidities are often present, such as cerebrovascular disease, dementia, heart failure and chronic lung disease [Hilmer 2017].

### GENERAL PRINCIPLES

Ensure multidisciplinary collaboration amongst the health and social/community care teams within the decision-making process when managing people with multimorbidity, cognitive impairment and functional decline. **PP** [Taskforce/WHO]

Early specialist advice should be considered in older people living with frailty and/or with cognitive impairment. **PP** [Taskforce]

Provide opportunities for people to maintain activity, such as placing a chair beside the bed and delivery of rehabilitation interventions via virtual means where possible. **PP** [Taskforce]

### POLYPHARMACY

Consider reducing polypharmacy or reaffirming clear indications for each medication. Polypharmacy is common and often harmful. In patients with COVID-19 and many medications can be omitted, stopped or converted to a once daily formulation limiting contact with patients, such as providing medications, is important during COVID-19 illness. **PP** [Taskforce]

## Managing breathlessness or cough

### COVID-19 SPECIFIC

Avoid fans and nebulised medications due to potential for aerosol generation. **PP** [Taskforce/ANZSPM]

### GENERAL TREATMENT

Non-pharmacological measures to manage breathlessness should be considered; these include positioning, relaxation techniques, wiping the face with cool wipes, reducing room temperature. **PP** [Scottish Palliative Care Guidelines/NHS UK]  
For further advice go to [The Australian & New Zealand Society of Palliative Medicine](#).

For management of the symptoms of breathlessness or cough, use opioids as per usual care. Consider the addition of a benzodiazepine (for example midazolam) if breathlessness persists. **PP** [Taskforce]  
For further advice go to [The Australian & New Zealand Society of Palliative Medicine](#).

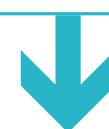

## Active disease-directed care

If goals of care include active disease management, please see recommendations for the treatment of COVID-19 in our [living guidelines](#). Of particular note are recommendations for [respiratory support](#) and [disease modifying treatments](#).  
**EBR** [Taskforce]

Treat potentially reversible causes of symptoms (e.g. delirium), such as urinary retention, pain or constipation and prevent and/or treat these causes. **PP** [ANZSPM]

Recognise that treatment may be required for other illnesses, not only for COVID-19. **PP** [Taskforce]

## Managing delirium, anxiety and agitation

### COVID-19 SPECIFIC

Delirium may be the sole presenting symptom in some patients. **PP** [Taskforce/ANZSPM]

Prevention of delirium, as per usual practice, is critical. In people with COVID-19, delirium can increase risk to other patients and staff as it may impact on the person's capacity to understand and follow infection control measures and maintain isolation. **PP** [Taskforce]

Early detection of delirium to allow timely treatment requires regular screening. Delirium usually has multiple causes or contributing factors, and other aetiologies other than COVID-19 should be also considered. **PP** [Taskforce]

There are other additional factors which can promote anxiety, distress and agitation of patients, including clinicians wearing PPE, isolation and limitation of visitors. **PP** [ANZSPM]

If possible, optimise environment (within infection control restrictions):

- manage in a low-stimulus environment
  - provide support with sleep hygiene
  - use reorientation strategies (e.g. clock, calendar, radio, room board etc)
  - avoid unnecessary patient movement between wards/rooms.
- PP**
- [ANZSPM]

### GENERAL TREATMENT

For non-pharmacological prevention and management of delirium and agitation, follow guidance as per usual care. **PP** [Taskforce]  
For further advice go to [SIGN delirium guidelines](#) and [ACSQHC delirium clinical standard](#).

For pharmacological prevention and management of delirium and agitation, follow guidance as per usual care. **PP** [Taskforce]  
For further advice go to [SIGN delirium guidelines](#) and [ACSQHC delirium clinical standard](#).

## Escalation of care

When considering treatment options, take into account individual decision-making around goals of care. This includes decisions around proceeding to more invasive forms of ventilation, transfer to ICU and cardiopulmonary resuscitation.  
**PP** [Taskforce/ANZSPM]

The net clinical benefit for each patient should be considered on a case-by-case basis, as older people with frailty and/or cognitive impairment may have reduced benefit and increase potential harms when escalating treatment. **PP** [Taskforce]

Decisions around proceeding to more invasive forms of ventilation should be discussed with the patient or their substitute/medical treatment decision-maker. **PP** [Taskforce]

If a person has symptoms such as breathlessness or delirium which are difficult to manage, and/or is imminently dying, specialist palliative care support and advice should be sought.  
**PP** [Taskforce/SIGN]

## Ongoing care

Recognise that ongoing care may be required for some patients who present with post-acute COVID-19 signs and symptoms. For assessment of symptoms and signs that are described by people with post-acute COVID-19 refer to our flowchart for [care of people with post-acute COVID-19](#). **PP** [Taskforce]

### Sources

- ANZSPM** - The Australian & New Zealand Society of Palliative Medicine Inc. (ANZSPM) Guidance - palliative care in the COVID-19 context. April 2020.
- ACSQHC** - Australian Commission on Safety and Quality in Health Care (ACSQHC). Delirium Clinical Care Standard. 2016.
- Hilmer SN, Gnjidic D.** Prescribing for frail older people. Aust Prescr. 2017;40(5):174-178. doi:10.18773/austprescr.2017.055
- NHS UK** - National Health Service (NHS). Specialty guides for patient management during the coronavirus pandemic. Clinical guide for the management of palliative care in hospital during the coronavirus pandemic. 22 April 2020 V2.
- NICE** - The National Institute for Health and Care Excellence (NICE). COVID-19 rapid guideline: managing symptoms (including at the end of life) in the community. 3 April 2020.
- NHS Scotland** - Scottish Palliative Care Guidelines. Supportive and Palliative Care Temporary Guideline. End of Life Care Guidance when a Person is Imminently Dying from COVID-19 Lung Disease. 29 April 2020.
- SIGN** - Scottish Intercollegiate Guidelines Network (SIGN). COVID-19 position statement: Presentations and management of COVID-19 in older people in acute care. 29 May 2020.
- National COVID-19 Clinical Evidence Taskforce** - Australian guidelines for the clinical care of people with COVID-19. <https://app.magicapp.org/#/guideline/L4Q5An>.
- WHO** - World Health Organisation (WHO). Clinical management of COVID-19: interim guidance. 27 May 2020.

# MANAGEMENT OF PEOPLE WITH COVID-19 WHO ARE RECEIVING PALLIATIVE CARE

## LEGEND

**EBR:** Evidence-Based Recommendation  
**CBR:** Consensus-Based Recommendation  
**PP:** Practice Point

Living  
guidance

Not prioritised  
for review

**VERSION 3.0**

PUBLISHED  
1 JULY 2021

## Overarching principles of care

### GOALS OF CARE

Identify if the patient has an advance care directive or plan. If yes, reaffirm prior decision. **PP** [Taskforce]

Ensure early discussion with the patient around goals of care, which may include active disease-directed care. If the patient has a legal guardian for medical decision-making, they should be contacted. **PP** [Taskforce]

Respect priorities and preferences and take these into account where possible when deciding on and communicating the care plan. **PP** [Taskforce]

Undertake a clinical assessment to determine expected prognosis, taking into account COVID-19 illness and underlying conditions. **PP** [Taskforce]

### COMMUNICATION

Establish a timely and ongoing regular line of communication, with a nominated family/caregiver. **PP** [Taskforce]

Visiting restrictions should be included in care planning discussions to enable patients and families to make informed decisions. **PP** [Taskforce/ANZSPM]

Minimise sensory impairment (e.g. hearing aids available and working, glasses available, and utilise other augmentative and alternative communication devices such as communication boards, electronic communication devices). **PP** [Taskforce]

Ensure effective communication, including the use of interpreters or cultural care workers where appropriate. Remember that those with sensory impairments may not be able to hear or use lip reading to assist in understanding if clinicians have masks on. Consider written communication via room boards or paper on clipboards. **PP** [Taskforce/ANZSPM]

Respiratory distress and a diagnosis of COVID-19 will likely cause high levels of anxiety and distress. There may be worsening of pre-existing mental health conditions. **PP** [SA Health]  
Communicate with patients and support their mental wellbeing to help alleviate any anxiety and fear they may have about COVID-19. **PP** [NICE]

COVID-19 limits face-to-face contact, which is an important part of palliative care. Ensure that regular conversations and communication continue and are supported digitally, particularly if the patient is deteriorating or imminently dying. For example, by use of two-way radios (such as baby monitors) or video tablets to communicate at length without masks and other PPE from outside the patient's room. **PP** [Taskforce/ANZSPM]

### People requiring palliative care and COVID-19

This population includes people with COVID-19 whose prognosis due to co-existing advanced progressive disease is limited or uncertain, or people with critical COVID-19 illness where recovery is not expected.

### GENERAL PRINCIPLES

Ensure multidisciplinary collaboration amongst the health and social/community teams including pastoral care, within the decision-making process and care delivery. **PP** [Taskforce/WHO]

Early specialist advice should be considered for people requiring palliative care. **PP** [Taskforce]

Provide opportunities for people to maintain activity, such as placing a chair beside the bed and delivery of rehabilitation interventions via virtual means where possible. **PP** [Taskforce]

Risks of more complex grief and bereavement may be increased due to restrictions on patient contacts during the dying process, social distancing and community isolation, and increased financial and relationships stressors. **PP** [NSW Health]

### MEDICATION MANAGEMENT

Consider immediate release medications or whether slow release medications or an alternative route of delivery may reduce staff interaction and support infection control. **PP** [Taskforce]

For further advice go to [The Australian & New Zealand Society of Palliative Medicine](#).

Consider reducing polypharmacy or reaffirming clear indications for each medication. Polypharmacy is common and often harmful. In patients with COVID-19 and many medications can be omitted, stopped or converted to a once daily formulation limiting contact with patients, such as providing medications, is important during COVID-19 illness. **PP** [Taskforce]

Ensure cultural and spiritual/religious practices that are part of the person's wishes are identified, prioritised and observed/facilitated, where possible. Where not possible, due to infection control considerations, communication with the patient and family/carers is essential. **PP** [Taskforce/NSW Health]

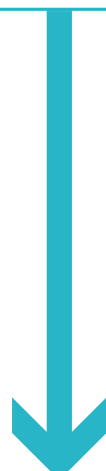



## Active disease-directed care

If goals of care include active disease management, please see recommendations for the treatment of COVID-19 in our [living guidelines](#). Of particular note are recommendations for [respiratory support](#) and [disease modifying treatments](#).  
**EBR** [Taskforce]

Treat potentially reversible causes of symptoms (e.g. delirium), such as urinary retention, pain or constipation and prevent and/or treat these causes. **PP** [ANZSPM]

Recognise that treatment may be required for other illnesses, not only for COVID-19. **PP** [Taskforce]

## Managing delirium, anxiety and agitation

### COVID-19 SPECIFIC

Delirium may be the sole presenting symptom in some patients.  
**PP** [Taskforce/ANZSPM]

Prevention of delirium, as per usual practice, is critical. In people with COVID-19, delirium can increase risk to other patients and staff as it may impact on the person's capacity to understand and follow infection control measures and maintain isolation.  
**PP** [Taskforce]

Early detection of delirium to allow timely treatment requires regular screening. Delirium usually has multiple causes or contributing factors, and other aetiologies other than COVID-19 should be also considered. **PP** [Taskforce]

There are other additional factors which can promote anxiety, distress and agitation of patients, including clinicians wearing PPE, isolation and limitation of visitors. **PP** [ANZSPM]

If possible, optimise environment (within infection control restrictions):

- manage in a low-stimulus environment
- provide support with sleep hygiene
- use reorientation strategies (e.g. clock, calendar, radio, room board etc)
- avoid unnecessary patient movement between wards/rooms.

**PP** [ANZSPM]

### GENERAL TREATMENT

For non-pharmacological prevention and management of delirium and agitation, follow guidance as per usual care. **PP** [Taskforce]  
For further advice go to [SIGN delirium guidelines](#) and [ACSQHC delirium clinical standard](#).

For pharmacological prevention and management of delirium and agitation, follow guidance as per usual care. **PP** [Taskforce]  
For further advice go to [SIGN delirium guidelines](#) and [ACSQHC delirium clinical standard](#).

## Managing breathlessness or cough

### COVID-19 SPECIFIC

Avoid fans and nebulised medications due to potential for aerosol generation. **PP** [Taskforce/ANZSPM]

### GENERAL TREATMENT

Non-pharmacological measures to manage breathlessness should be considered; these include positioning, relaxation techniques, wiping the face with cool wipes, reduce room temperature.  
**PP** [Scottish Palliative Care Guidelines/NHS UK]  
For further advice go to [The Australian & New Zealand Society of Palliative Medicine](#).

For management of the symptoms of breathlessness or cough, use opioids as per usual care. Consider the addition of a benzodiazepine (for example midazolam) if breathlessness persists.  
**PP** [Taskforce]  
For further advice go to [The Australian & New Zealand Society of Palliative Medicine](#).

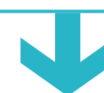

## Escalation of care

When considering treatment options, take into account individual decision-making around goals of care. This includes decisions around proceeding to more invasive forms of ventilation, transfer to ICU and cardiopulmonary resuscitation.  
**PP** [Taskforce/ANZSPM]

The net clinical benefit for each patient should be considered on a case-by-case basis, people requiring palliative care may have reduced benefit and increase potential harms when escalating treatment. **PP** [Taskforce]

Decisions around proceeding to more invasive forms of ventilation should be discussed with the patient or their substitute/medical treatment decision-maker. **PP** [Taskforce]

If a person has symptoms such as breathlessness or delirium which are difficult to manage, and/or is imminently dying, specialist palliative care support and advice should be sought.  
**PP** [Taskforce/SIGN]

## Ongoing care

Recognise that ongoing care may be required for some patients who present with post-acute COVID-19 signs and symptoms. For assessment of symptoms and signs that are described by people with post-acute COVID-19 refer to our flowchart for [care of people with post-acute COVID-19](#). **PP** [Taskforce]

### Sources

- ANZSPM** - The Australian & New Zealand Society of Palliative Medicine Inc. (ANZSPM) Guidance - palliative care in the COVID-19 context. April 2020.
- ACSQHC** - Australian Commission on Safety and Quality in Health Care (ACSQHC). Delirium Clinical Care Standard. 2016.
- Hilmer SN, Gnjidic D.** Prescribing for frail older people. Aust Prescr. 2017;40(5):174-178. doi:10.18773/austprescr.2017.055
- NHS UK** - National Health Service (NHS). Specialty guides for patient management during the coronavirus pandemic. Clinical guide for the management of palliative care in hospital during the coronavirus pandemic. 22 April 2020 V2.
- NICE** - The National Institute for Health and Care Excellence (NICE). COVID-19 rapid guideline: managing symptoms (including at the end of life) in the community. 3 April 2020.
- NHS Scotland** - Scottish Palliative Care Guidelines. Supportive and Palliative Care Temporary Guideline. End of Life Care Guidance when a Person is Imminently Dying from COVID-19 Lung Disease. 29 April 2020.
- NSW Health** - NSW Health, Palliative Care Community of Practice. Bereavement care guide. 2 June 2020.
- SIGN** - Scottish Intercollegiate Guidelines Network (SIGN). COVID-19 position statement: Presentations and management of COVID-19 in older people in acute care. 29 May 2020.
- National COVID-19 Clinical Evidence Taskforce** - Australian guidelines for the clinical care of people with COVID-19. <https://app.magicapp.org/#/guideline/L4Q5An>
- WHO** - World Health Organisation (WHO). Clinical management of COVID-19: interim guidance. 27 May 2020.
